# Supplementary material for: Anthelmintic Activity and Cytotoxic Effects of Compounds Isolated from the Fruits of Ozoroa insignis Del. (Anacardiaceae)
Source: MDPI journal article supplement (doi:10.3390/biom11121893), 2021-12-17
Supplement: s1 [file s1]

# Anthelmintic activity and cytotoxic effects of compounds isolated from the fruits of *Ozoroa insignis* Del. (Anacardiaceae)

Mthandazo Dube<sup>1</sup>, Mohamad Saoud<sup>1</sup>, Robert Rennert<sup>1</sup>, Ghislain Wabo Fotso<sup>2</sup>, Kerstin Andrae-Marobela<sup>3</sup>, Peter Imming<sup>4</sup>, Cécile Häberli<sup>5,6</sup>, Jennifer Keiser<sup>5,6</sup>, Norbert Arnold<sup>1\*</sup>

<sup>1</sup> Department of Bioorganic Chemistry, Leibniz Institute of Plant Biochemistry, Weinberg 3, D-06120 Halle (Saale), Germany

<sup>2</sup> Department of Organic Chemistry, Faculty of Science, University of Yaoundé 1, P.O. Box 812, Yaoundé, Cameroon

<sup>3</sup> Department of Biological Sciences, Faculty of Science, University of Botswana, P.O. Box 0022, Gaborone, Botswana

<sup>4</sup> Institute of Pharmacy, Faculty of Natural Sciences, Martin-Luther-University Halle-Wittenberg, D-06120 Halle (Saale), Germany

<sup>5</sup> Helminth Drug Development Unit, Department of Medical Parasitology and Infection Biology, Swiss Tropical and Public Health Institute, Socinstr. 57, CH-4051 Basel, Switzerland

<sup>6</sup> University of Basel, CH-4051 Basel, Switzerland

\*Correspondence: Norbert.Arnold@ipb-halle.de; Tel.: +49-345-5582-1310 (N.A.)

## Figures S1 - S9: HR-ESI-MS, 1D and 2D NMR of 6-[8(Z)-pentadecenyl] anacardic acid (1)

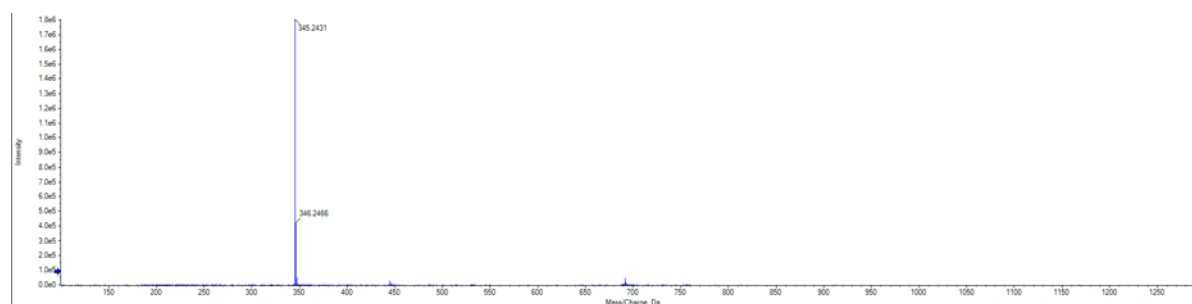

**Figure S1:** HR-ESI-MS spectrum (neg. mode) of 6-[8(Z)-pentadecenyl] anacardic acid (1).

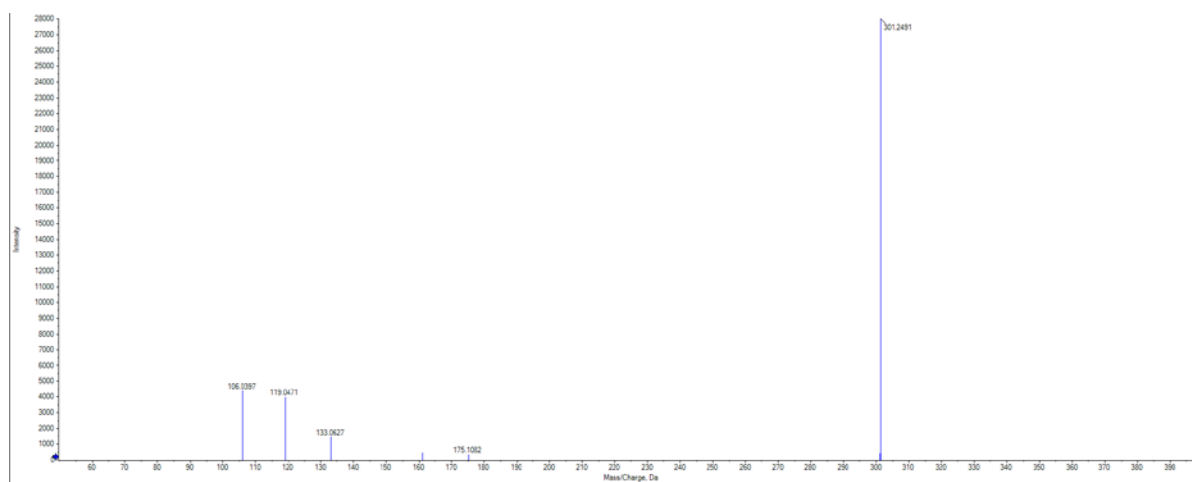

**Figure S2:** TOF MS<sup>2</sup> (neg. mode) of 6-[8(Z)-pentadecenyl] anacardic acid (**1**).

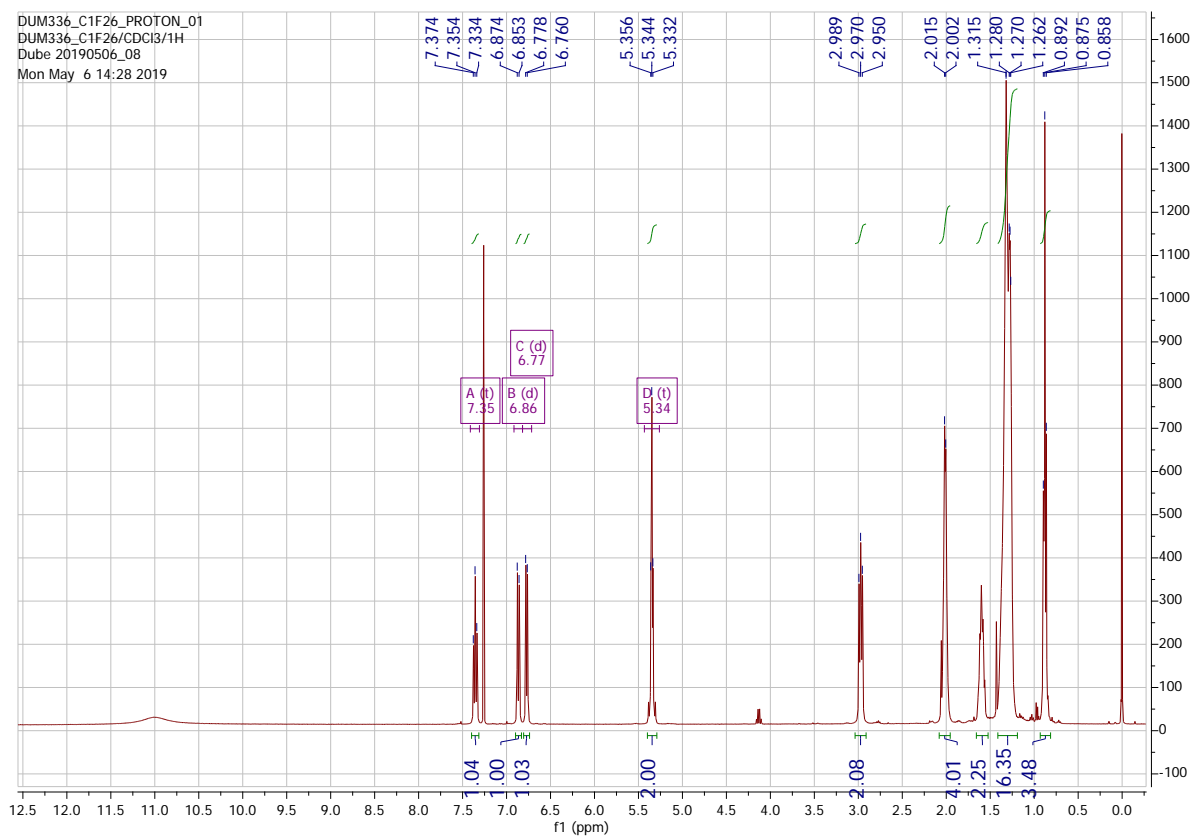

**Figure S3:**  $^1\text{H}$  NMR spectrum of 6-[8(Z)-pentadecenyl] anacardic acid (**1**) in  $\text{CDCl}_3$  (400 MHz).

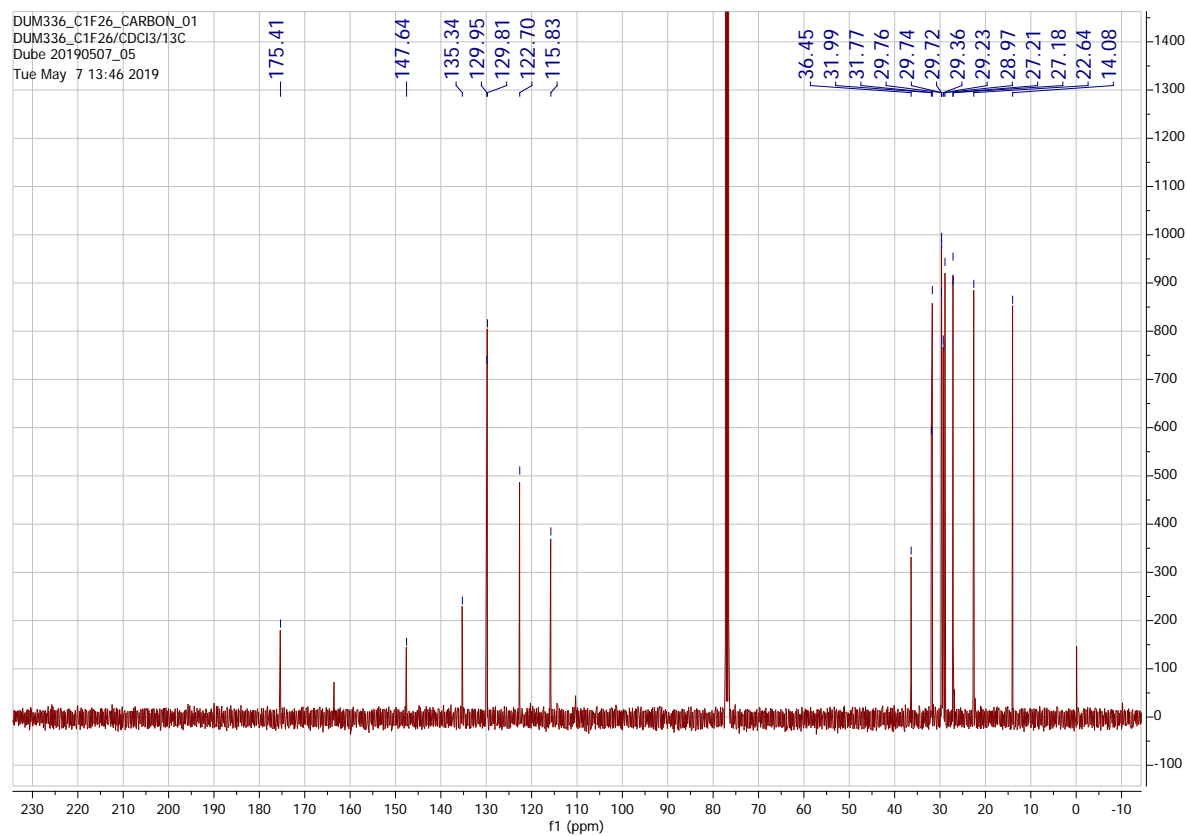

**Figure S4:**  $^{13}\text{C}$  NMR spectrum of 6-[8(Z)-pentadecenyl] anacardic acid (**1**) in  $\text{CDCl}_3$  (400 MHz).

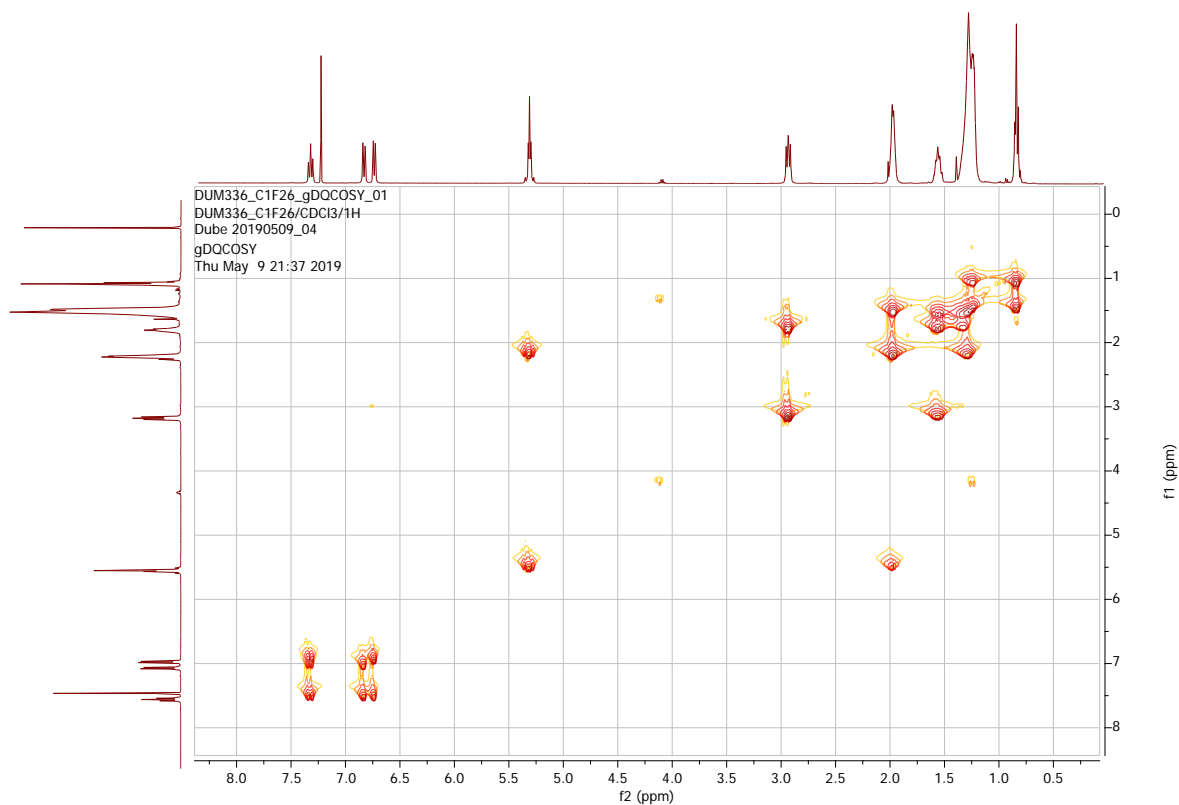

**Figure S5:** gDQCOSY spectrum of 6-[8(Z)-pentadecenyl] anacardic acid (**1**) in CDCl<sub>3</sub> (400 MHz).

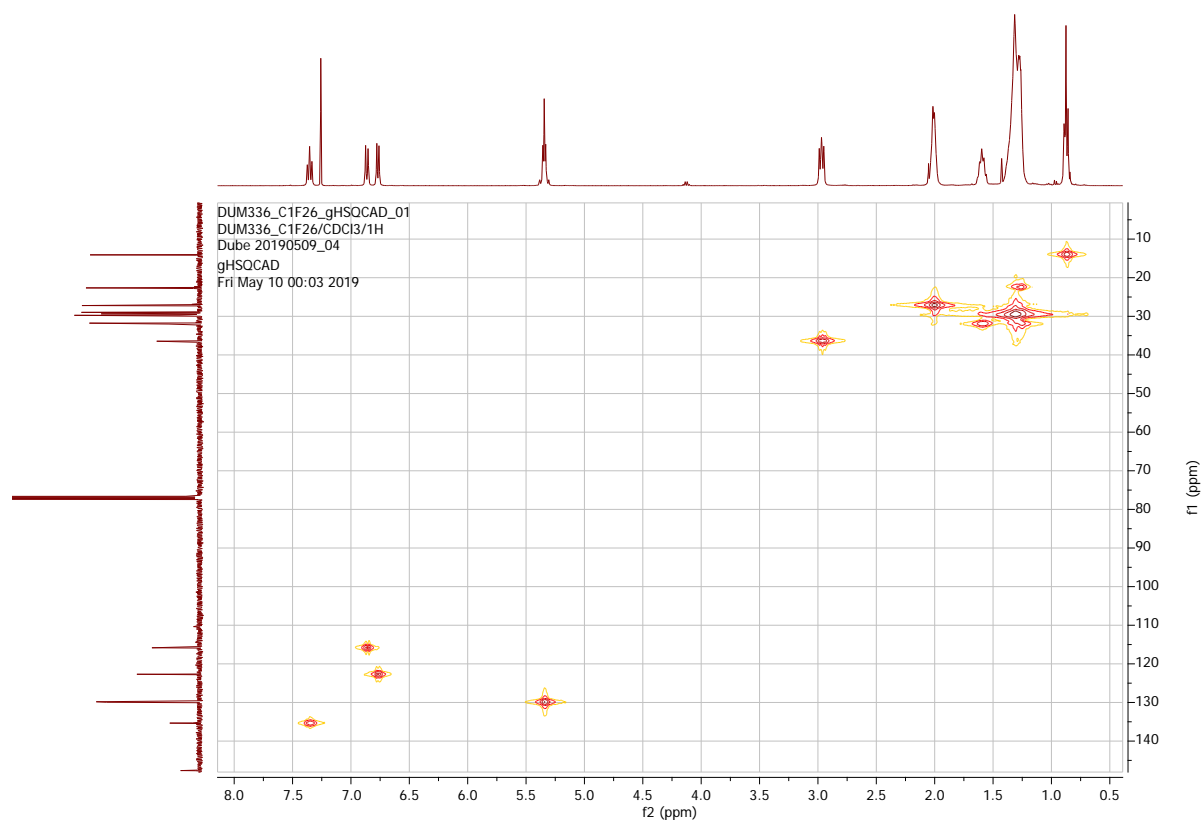

**Figure S6:** gHSQC spectrum of 6-[8(Z)-pentadecenyl] anacardic acid (**1**) in CDCl<sub>3</sub> (400 MHz).

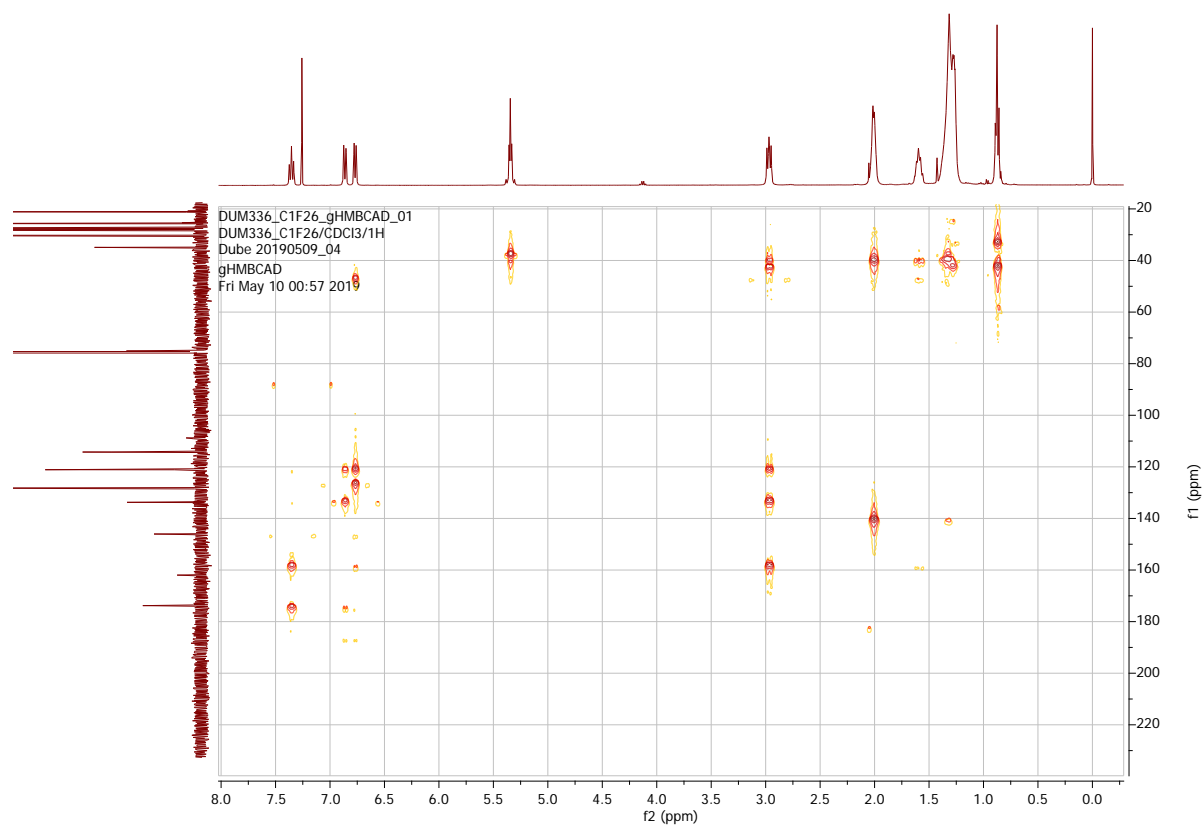

Figure S7: gHMBC spectrum of 6-[8(Z)-pentadecenyl] anacardic acid (**1**) in CDCl<sub>3</sub> (400 MHz).

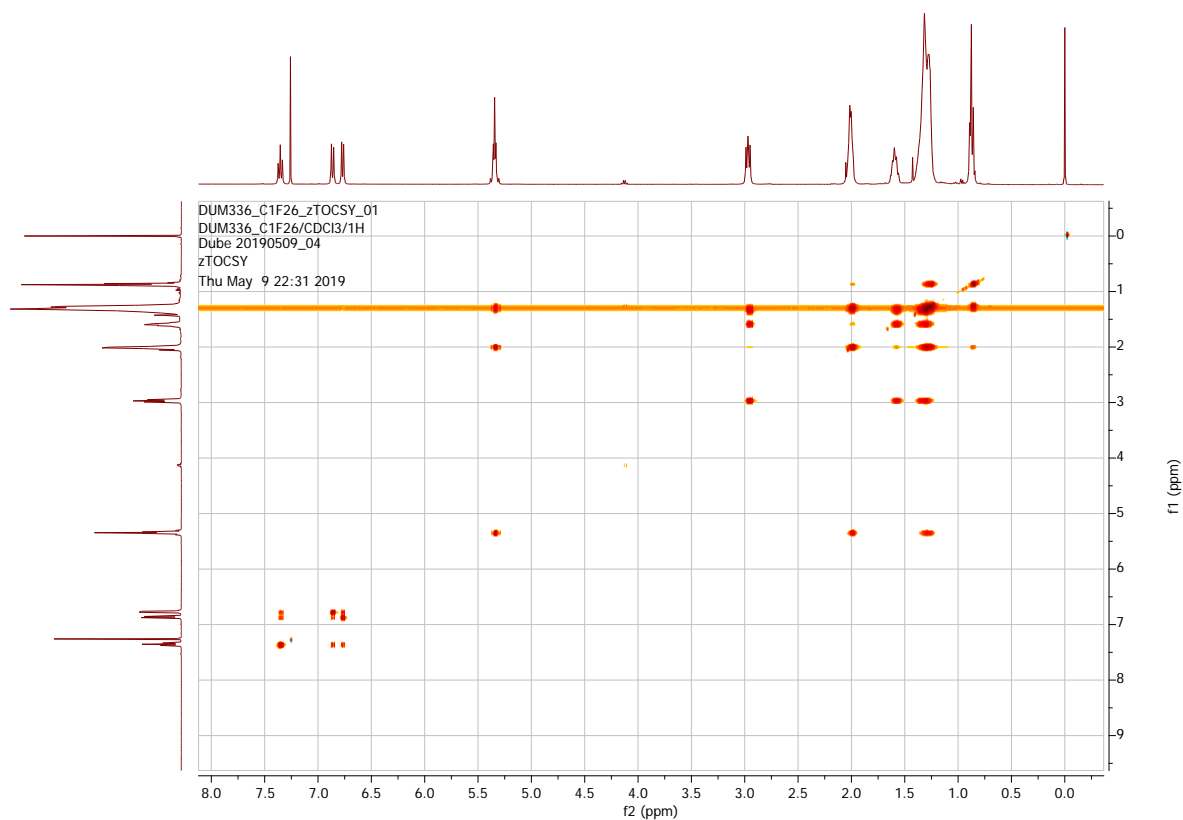

Figure S8: gTOCSY spectrum of 6-[8(Z)-pentadecenyl] anacardic acid (**1**) in CDCl<sub>3</sub> (400 MHz).

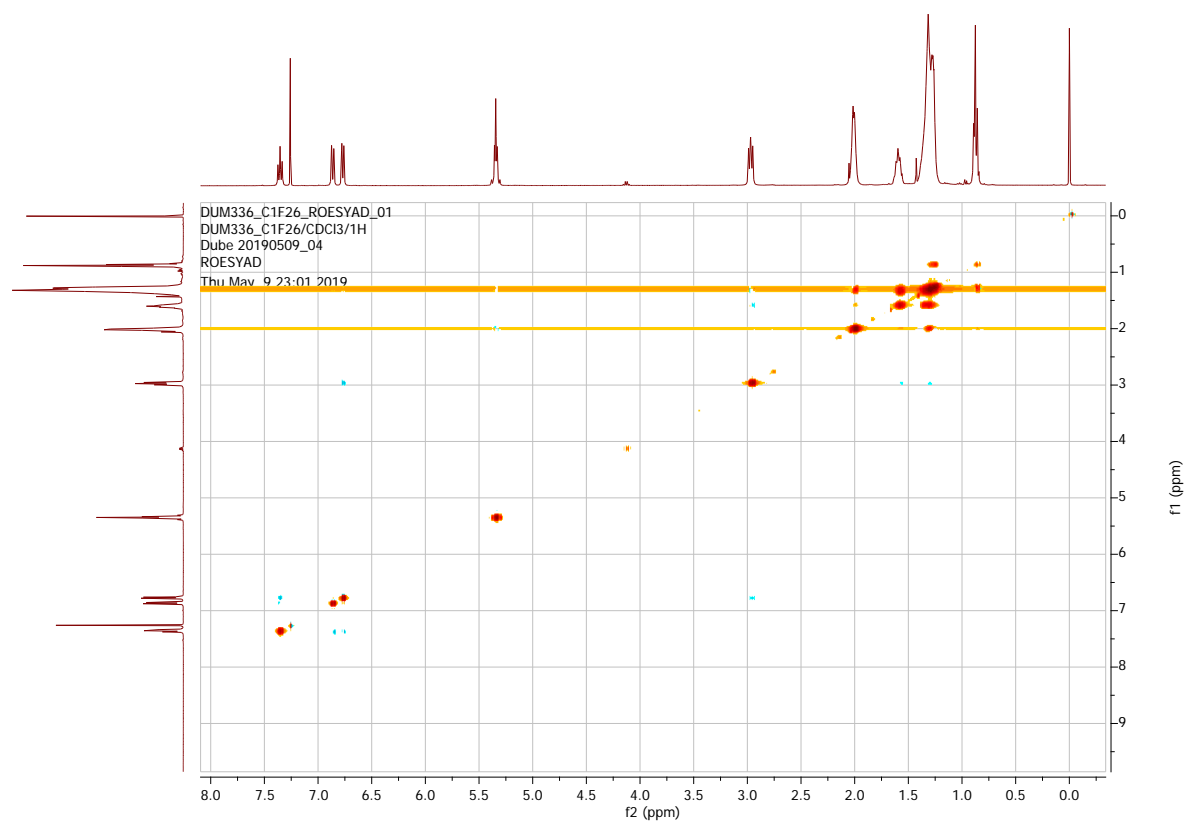

**Figure S9:** gROESY spectrum of 6-[8(Z)-pentadecenyl] anacardic acid (**1**) in CDCl<sub>3</sub> (400 MHz).

**Figures S10-S18: HR-ESI-MS, 1D and 2D NMR of 6-[10(Z)-heptadecenyl] anacardic acid (**2**)**

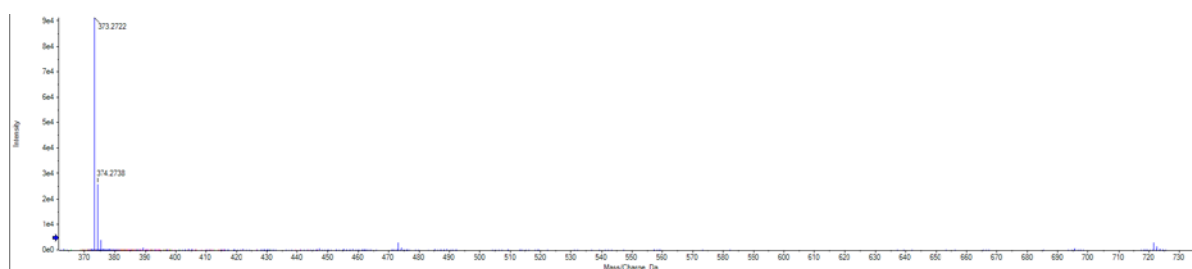

**Figure S10:** HR-ESI-MS spectrum (neg. mode) of 6-[10(Z)-heptadecenyl] anacardic acid (**2**).

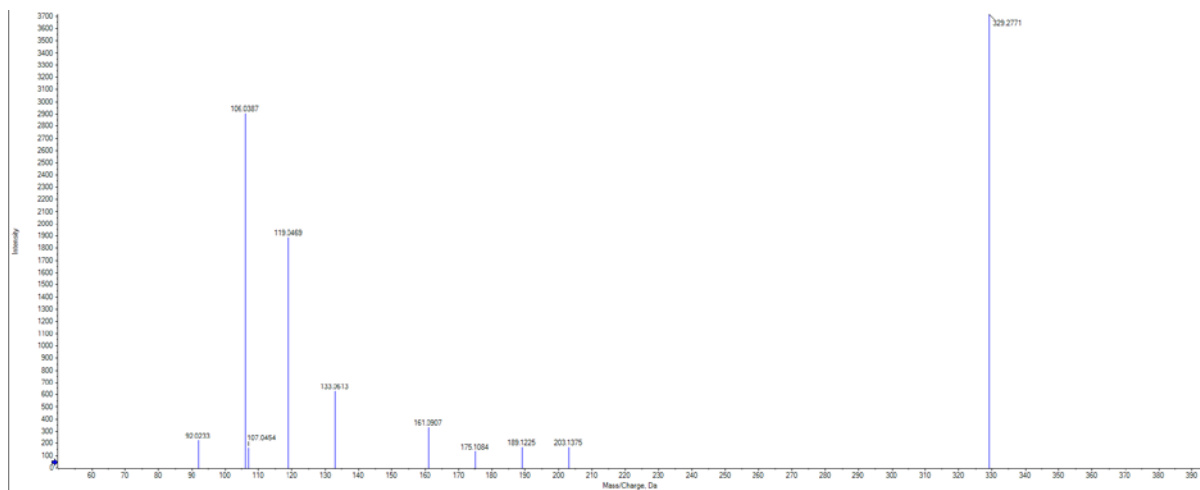

**Figure S11:** TOF MS<sup>2</sup> spectrum (neg. mode) of 6-[10(Z)-heptadecenyl] anacardic acid (2).

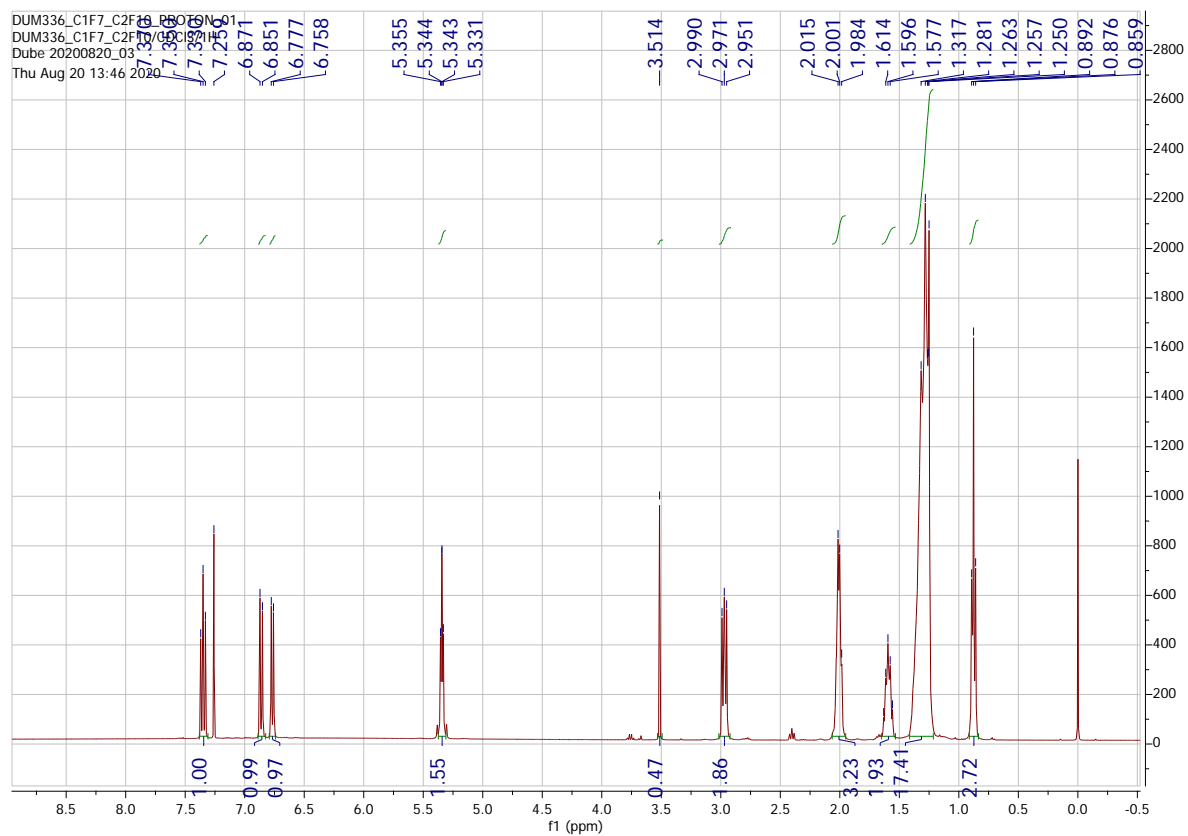

**Figure S12:** <sup>1</sup>H NMR spectrum of 6-[10(Z)-heptadecenyl] anacardic acid (2) in CDCl<sub>3</sub> (400 MHz).

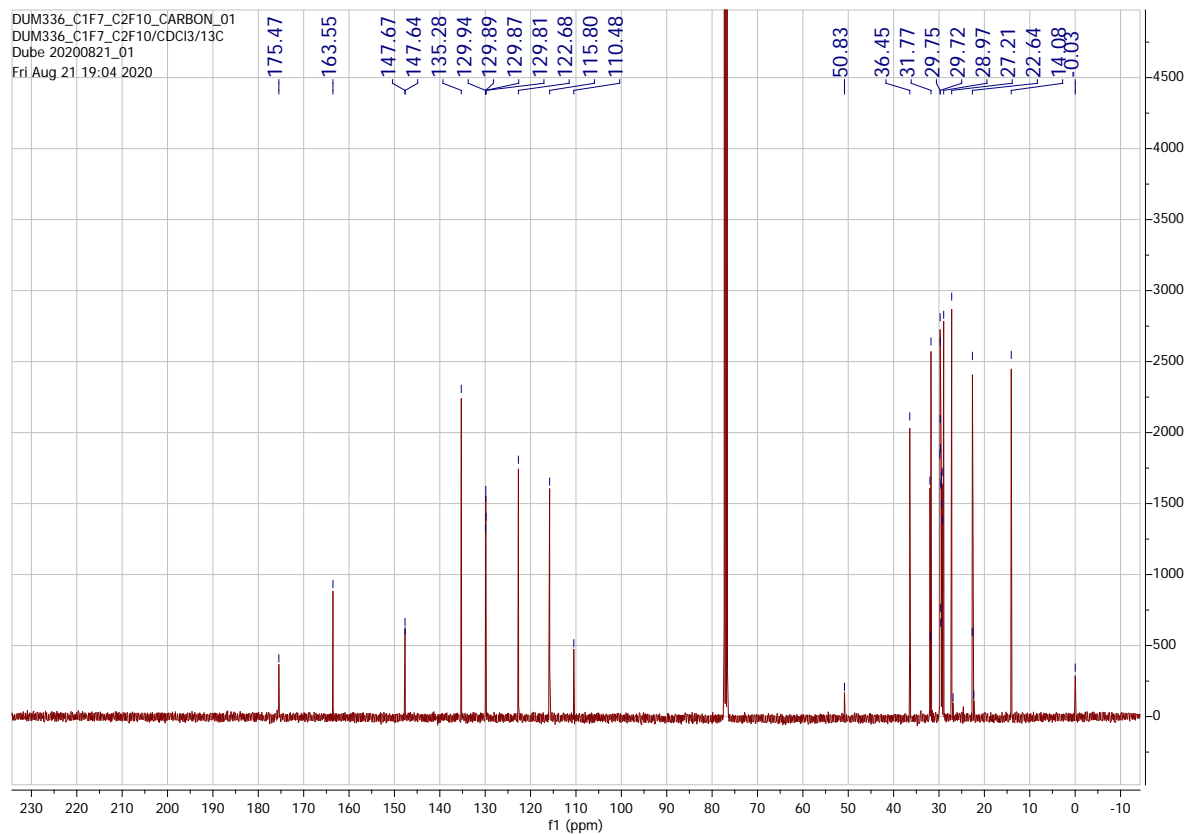

**Figure S13:**  $^{13}\text{C}$  NMR spectrum of 6-[10(Z)-heptadecenyl] anacardic acid (**2**) in  $\text{CDCl}_3$  (400 MHz).

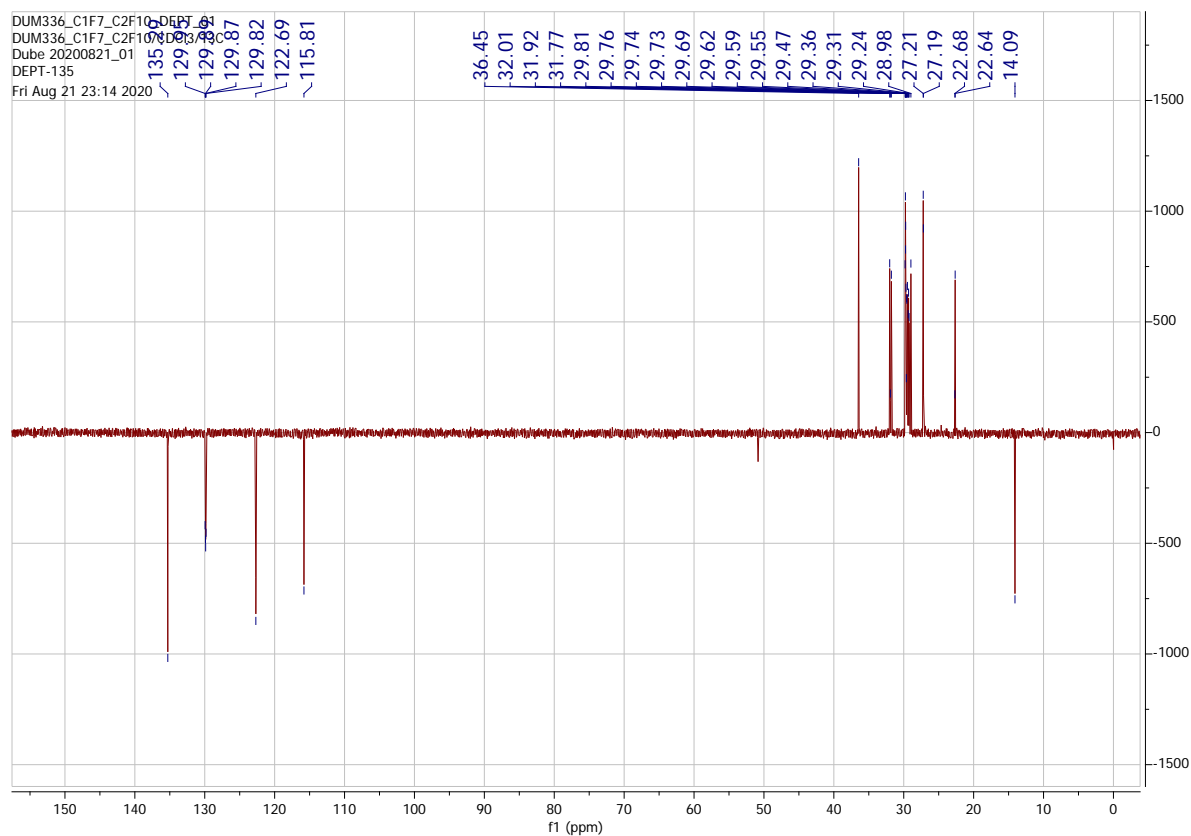

**Figure S14:** DEPT 135 spectrum of 6-[10(Z)-heptadecenyl] anacardic acid (**2**) in  $\text{CDCl}_3$  (400 MHz).



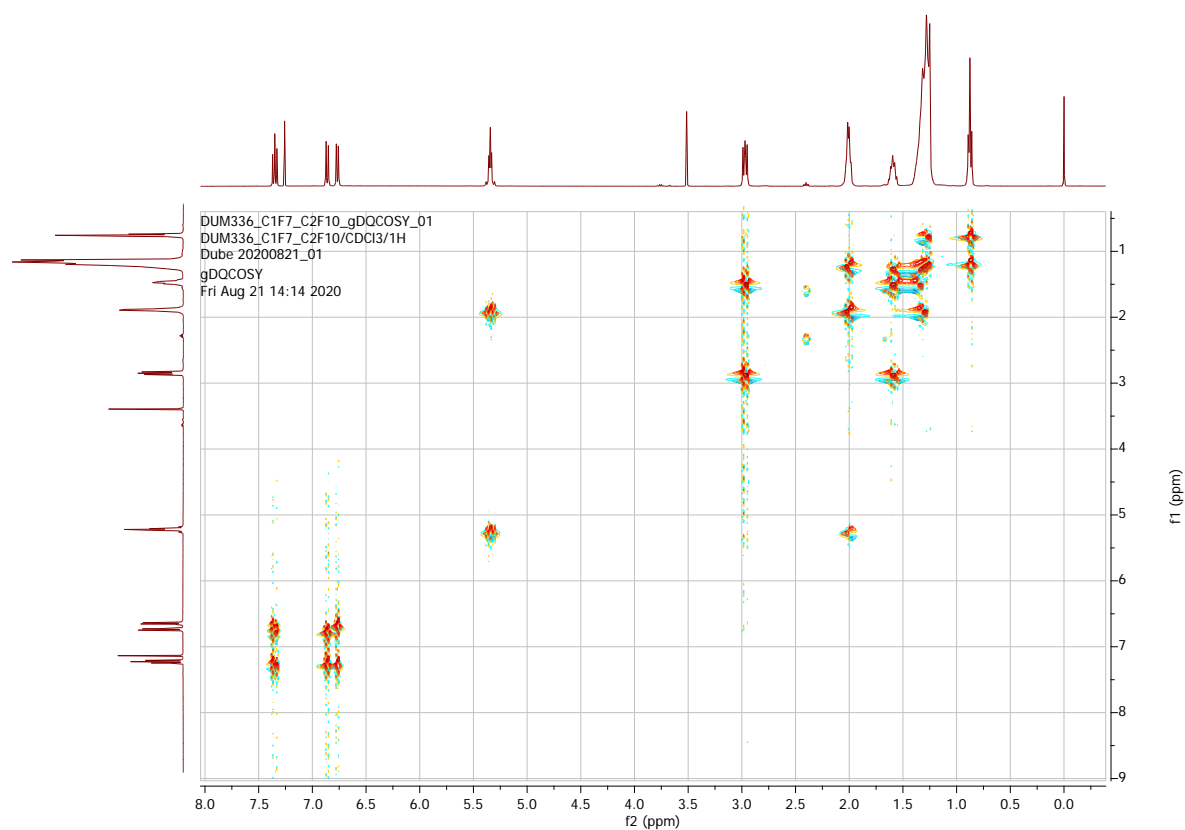

**Figure S15:** gDQCOSY spectrum of 6-[10(Z)-heptadecenyl] anacardic acid (**2**) in CDCl<sub>3</sub> (400 MHz).

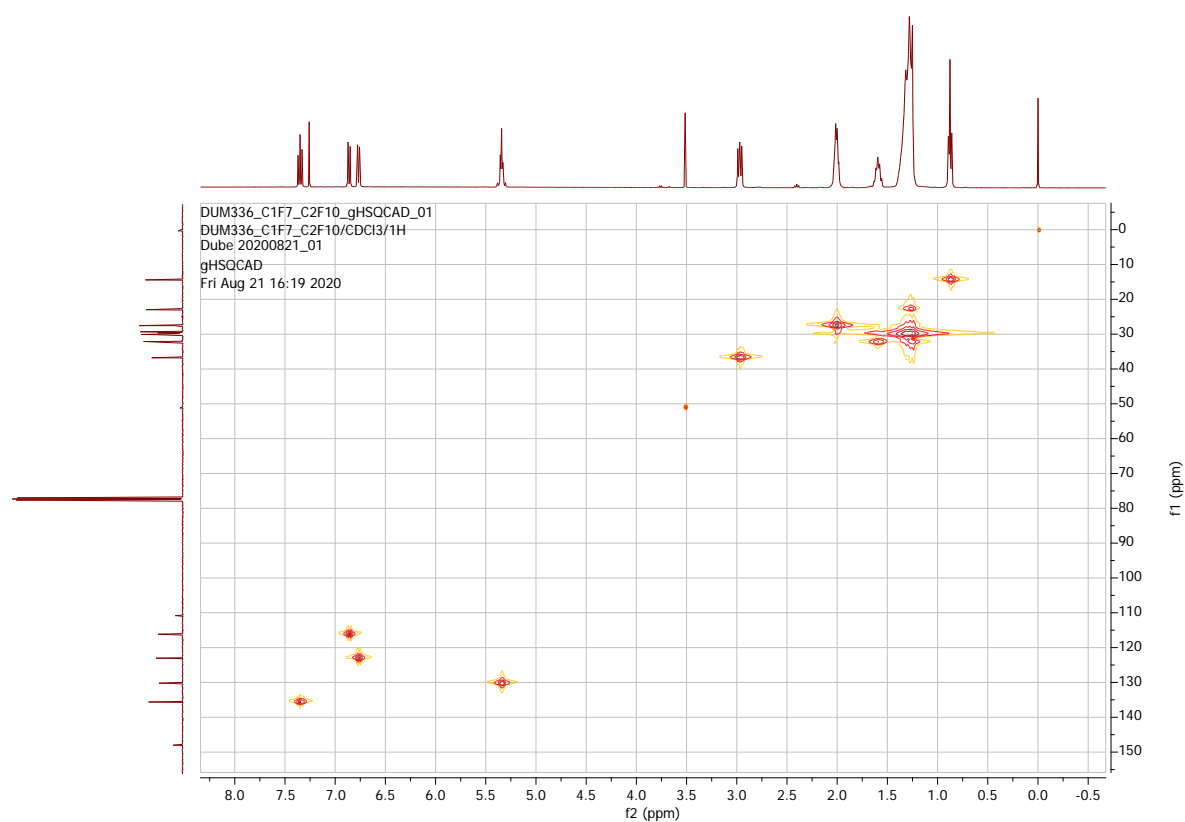

**Figure S16:** gHSQC spectrum of 6-[10(Z)-heptadecenyl] anacardic acid (**2**) in CDCl<sub>3</sub> (400 MHz).

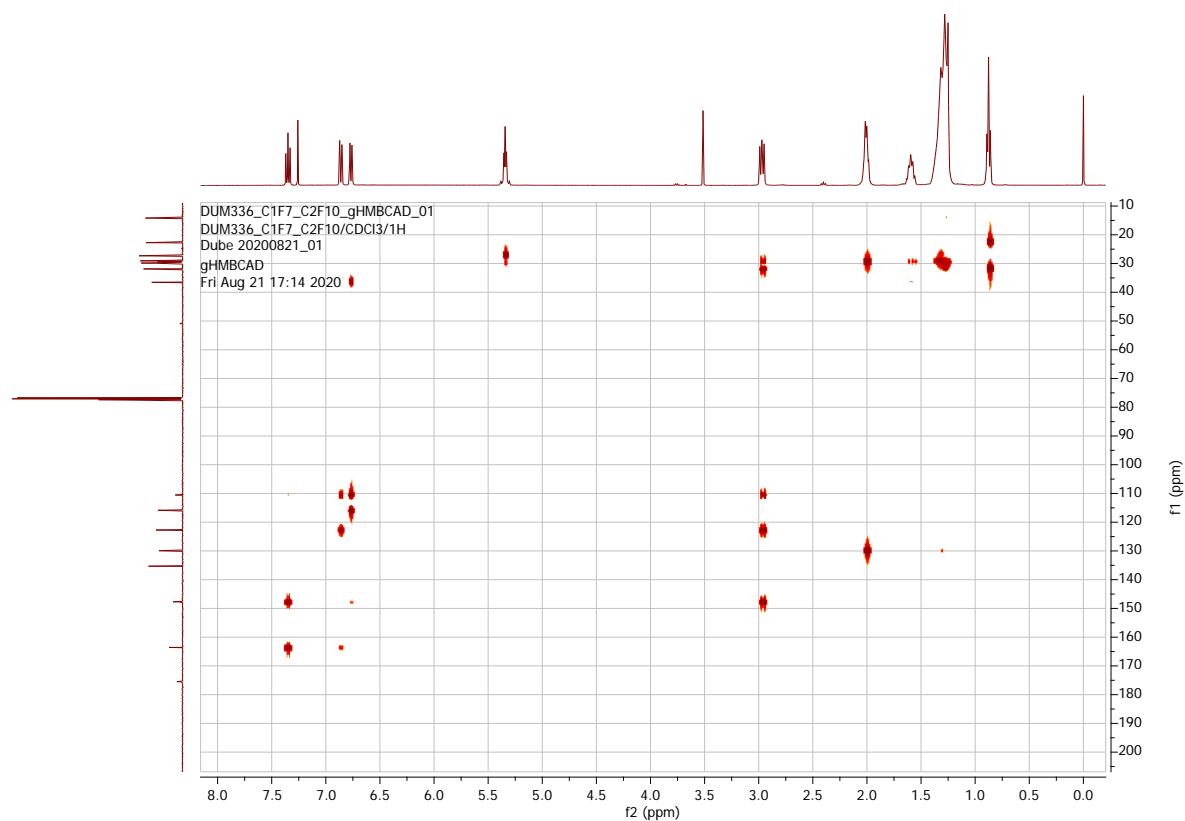

Figure S17: gHMBC spectrum of 6-[10(Z)-heptadecenyl] anacardic acid (2) in CDCl<sub>3</sub> (400 MHz).

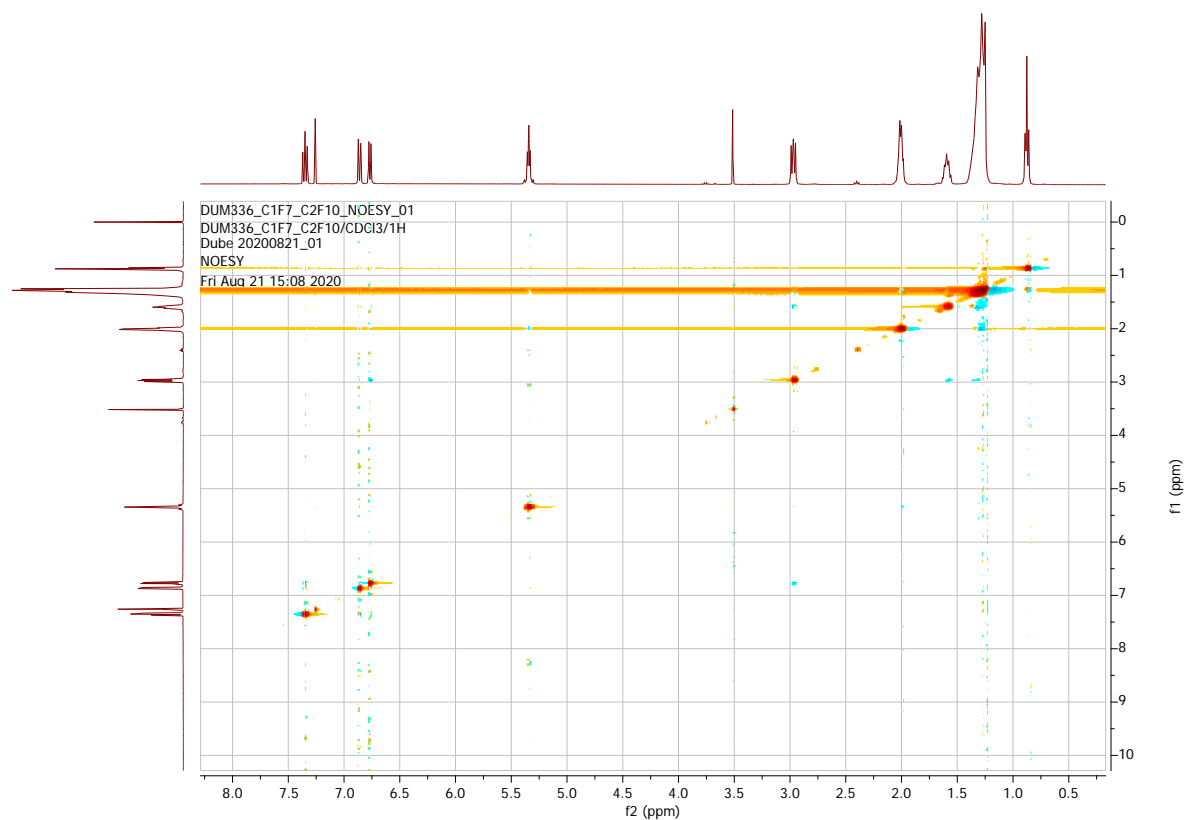

Figure S18: NOESY spectrum of 6-[10(Z)-heptadecenyl] anacardic acid (2) in CDCl<sub>3</sub> (400 MHz).

**Figures S19 - S27: HR-MS, 1D and 2D NMR of 3-[7(Z)-pentadecenyl] phenol (3)**

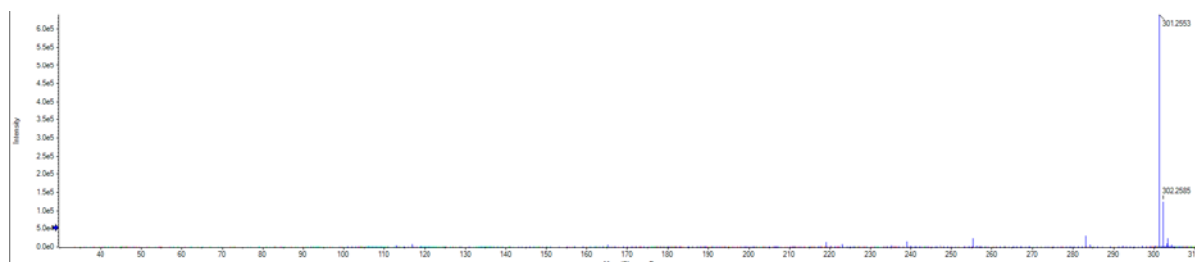

**Figure S19:** HR-ESI-MS spectrum (neg. mode) of 3-[7(Z)-pentadecenyl] phenol (3).

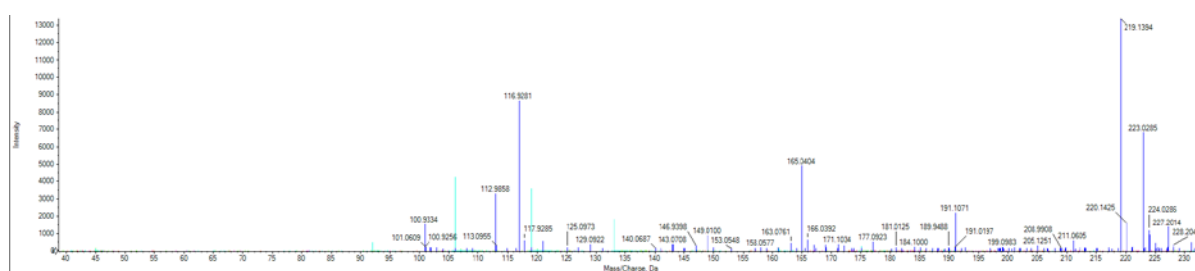

**Figure S20:** TOF MS<sup>2</sup> spectrum (neg. mode) of 3-[7(Z)-pentadecenyl] phenol (3).

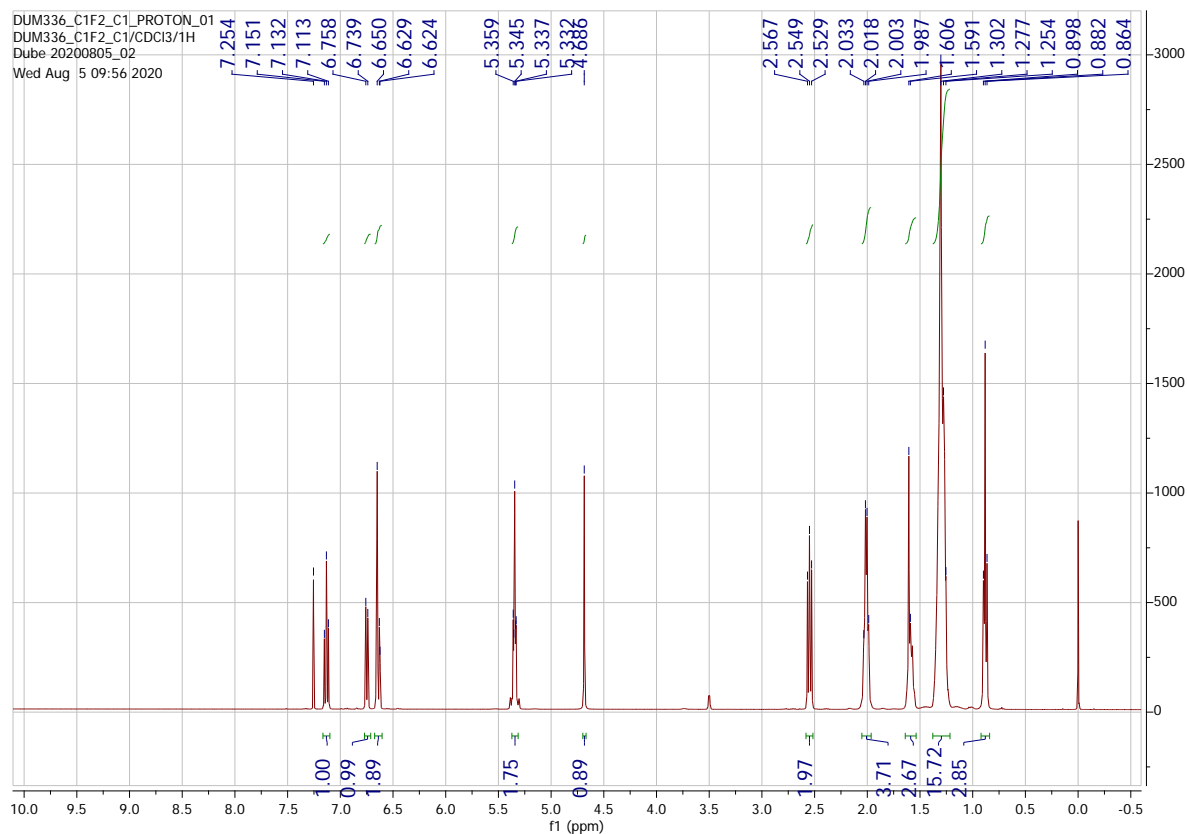

**Figure S21:** <sup>1</sup>H NMR spectrum of 3-[7(Z)-pentadecenyl] phenol (3) in CDCl<sub>3</sub> (400 MHz).

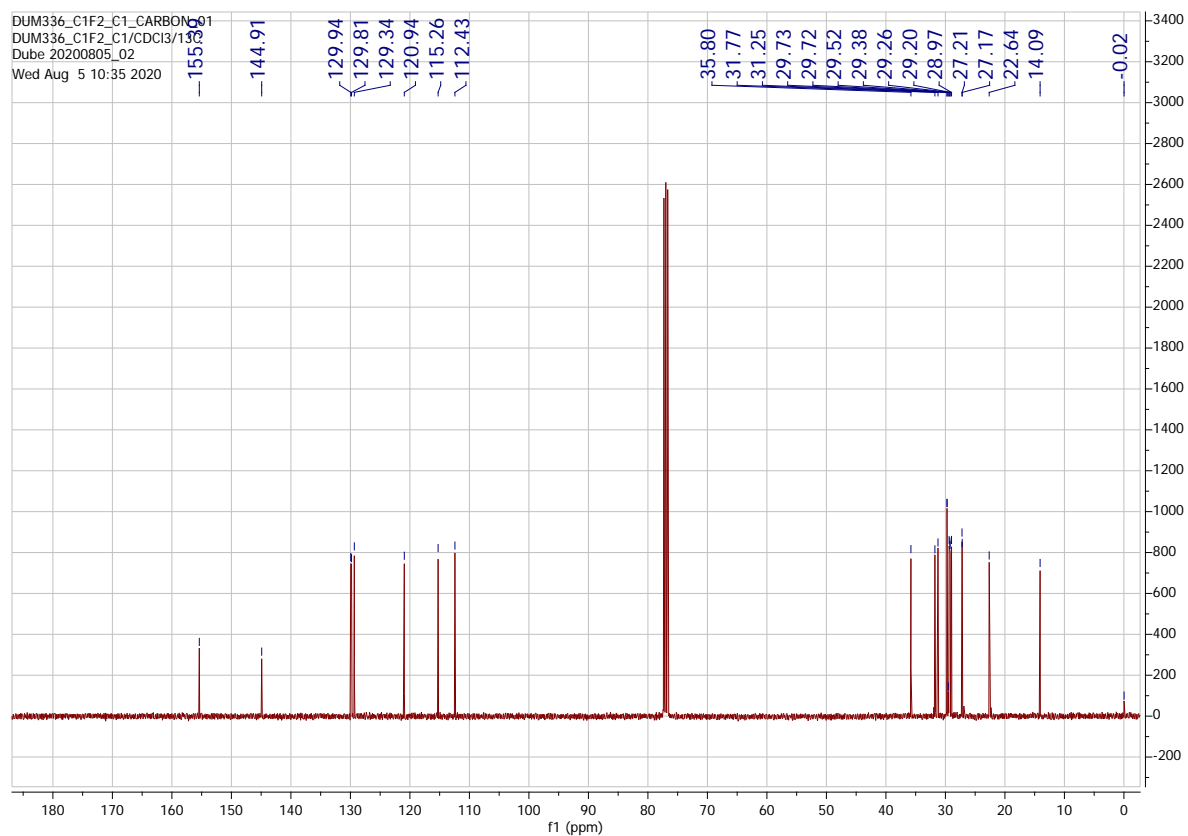

**Figure S22:**  $^{13}\text{C}$  NMR spectrum of 3-[7(Z)-pentadecenyl] phenol (**3**) in  $\text{CDCl}_3$  (400 MHz).

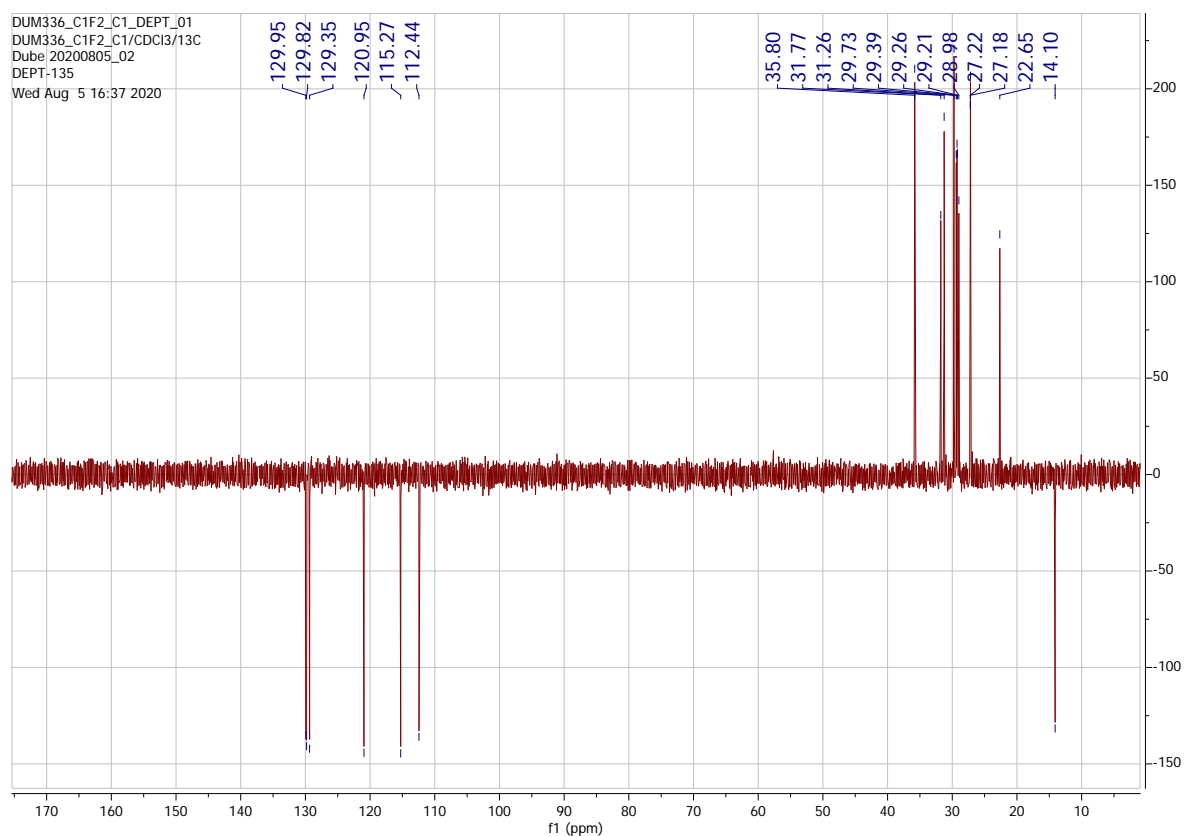

**Figure S23:** DEPT 135 spectrum of 3-[7(Z)-pentadecenyl] phenol (**3**) in  $\text{CDCl}_3$  (400 MHz).

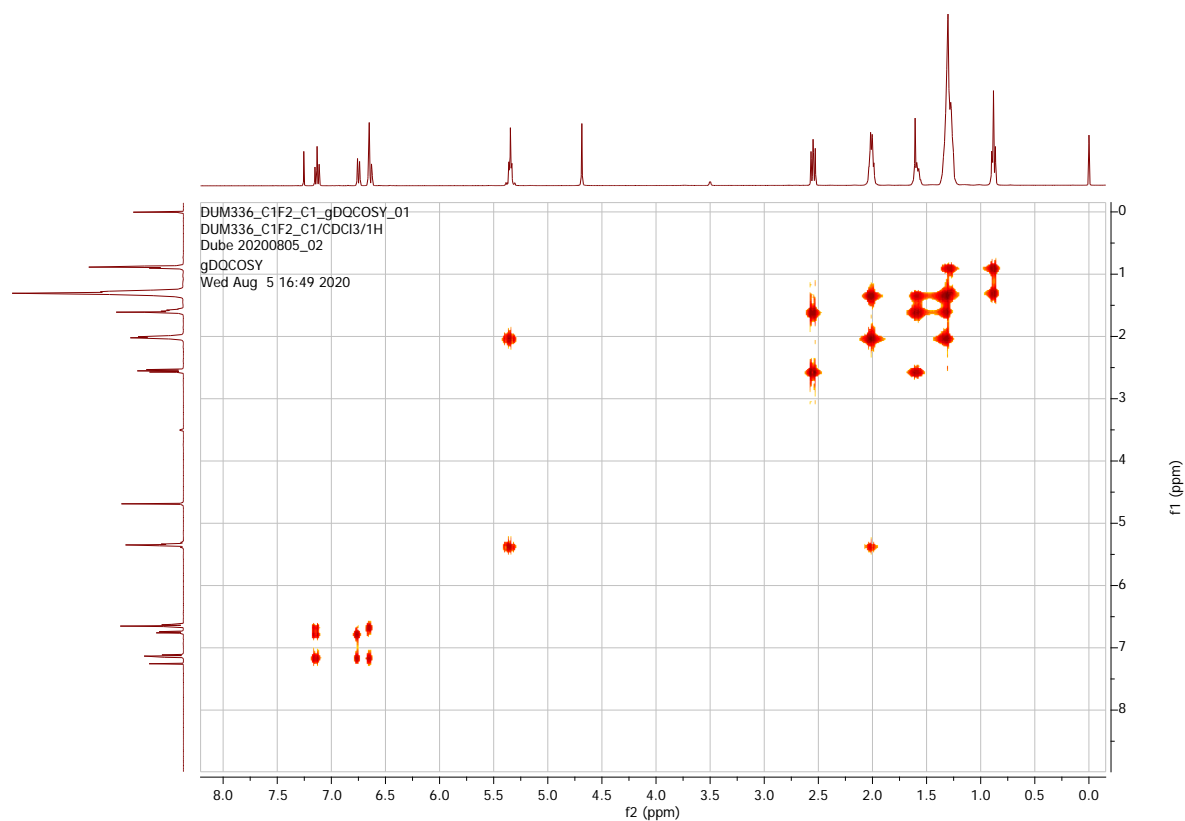

**Figure S24:** gDQCOSY spectrum of 3-[7(Z)-pentadecenyl] phenol (**3**) in CDCl<sub>3</sub> (400 MHz).

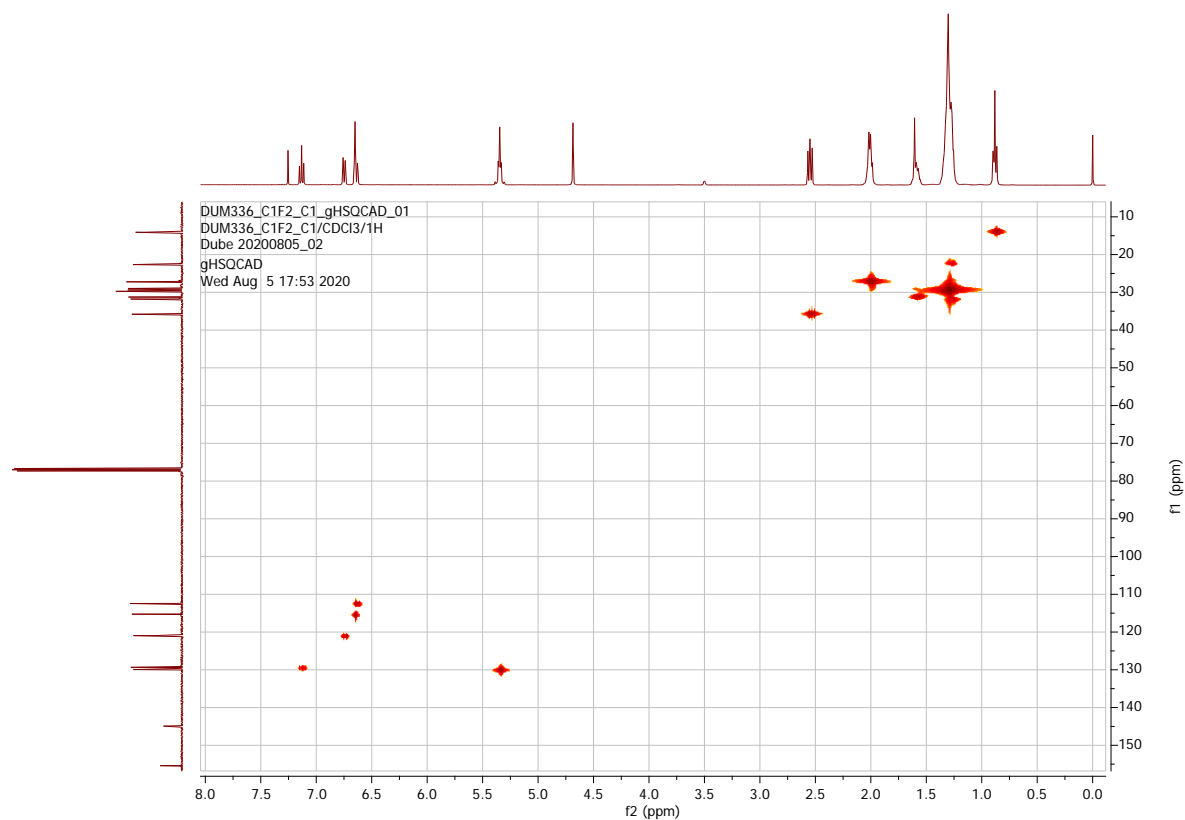

**Figure S25:** gHSQC spectrum of 3-[7(Z)-pentadecenyl] phenol (**3**) in CDCl<sub>3</sub> (400 MHz).

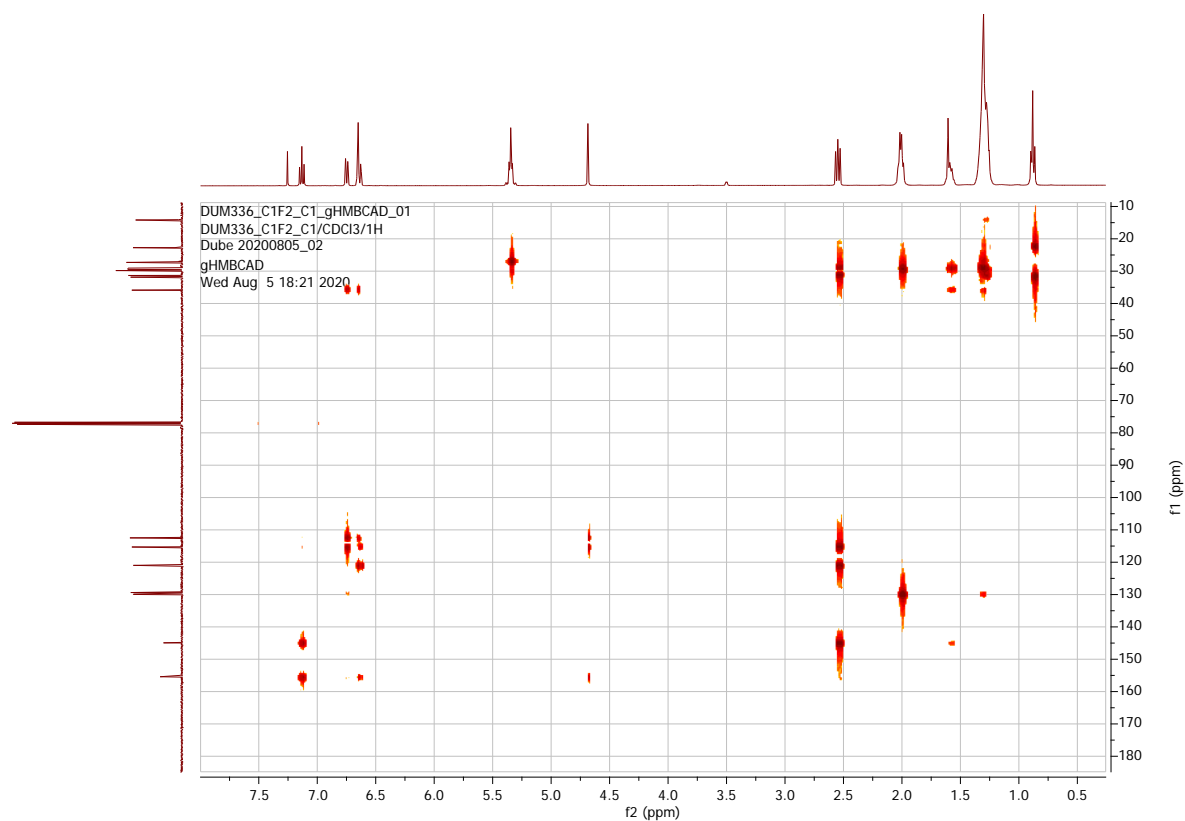

Figure S26: gHMBC spectrum of 3-[7(Z)-pentadecenyl] phenol (**3**) in CDCl<sub>3</sub> (400 MHz).

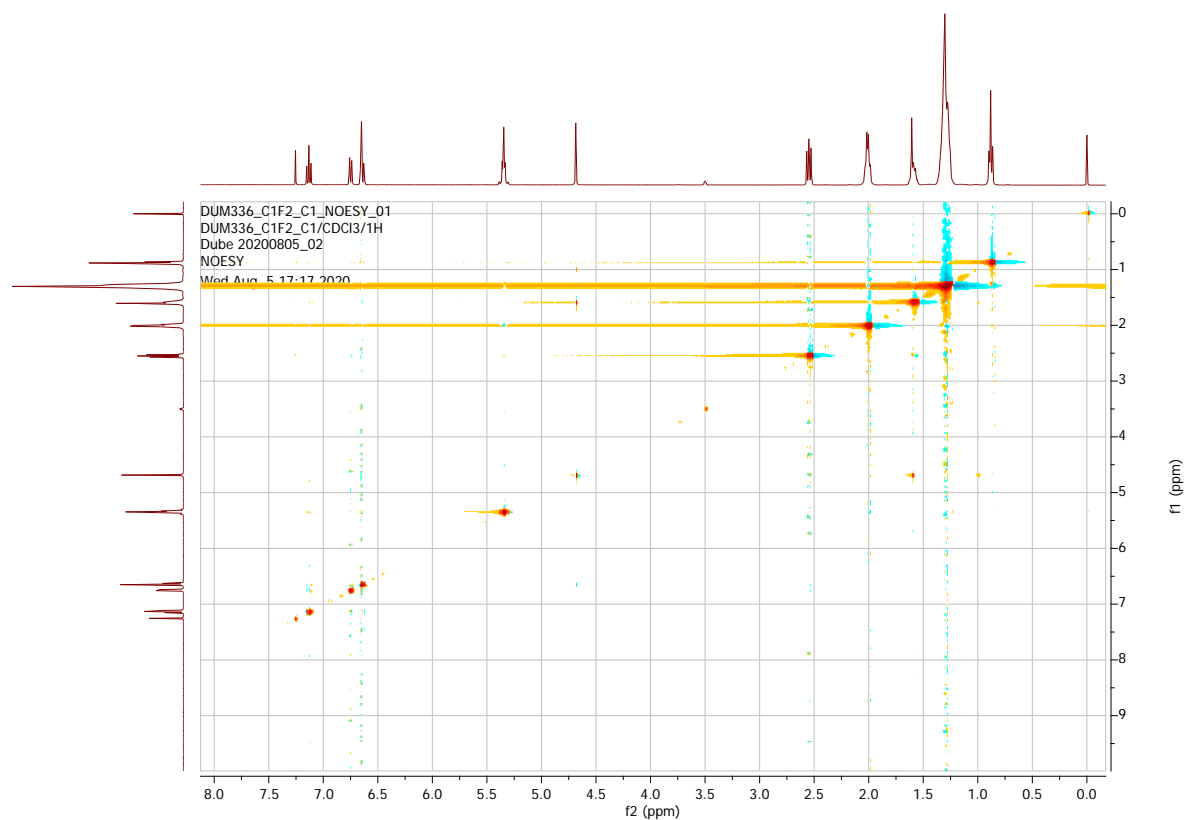

Figure S27: NOESY spectrum of 3-[7(Z)-pentadecenyl] phenol (**3**) in CDCl<sub>3</sub> (400 MHz).

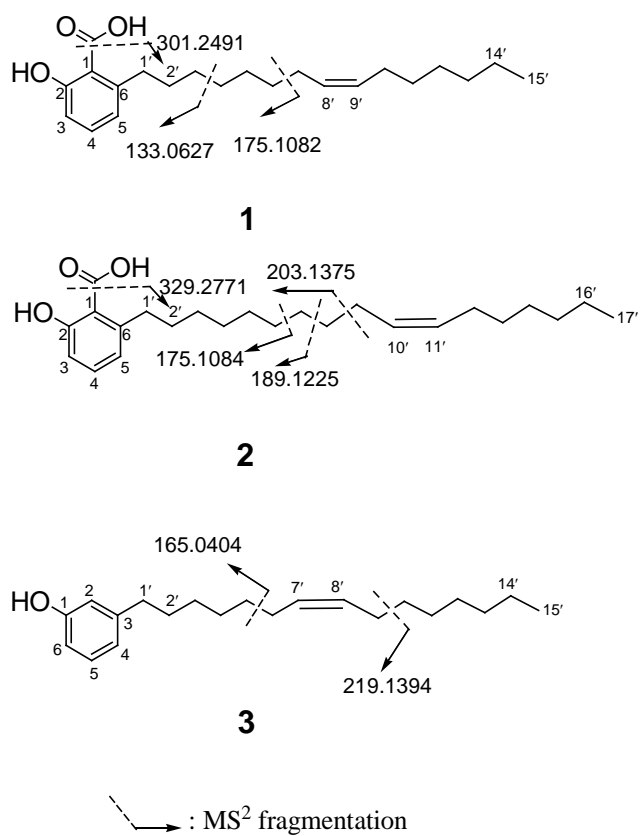

**Figure S28:** Important fragment ions on the TOF MS<sup>2</sup> spectra of compounds 1-3.

**Table S1:** Anthelmintic activity using *C. elegans*: *Ozoroa insignis* plant parts (80 % methanol extract; test concentration 500 µg/mL; positive control ivermectin 10µg/mL).

| Phase          | Activity % * |
|----------------|--------------|
| Fruit extract  | 91.73 ± 6.05 |
| Root extract   | 35.11 ± 2.91 |
| Leaves extract | 17.58 ± 3.28 |
| Stem extract   | 16.42 ± 7.86 |
| Ivermectin     | 98.77 ± 1.74 |
| 2% DMSO        | 1.91 ± 1.38  |

\*Activity % based on three replicates.

**Table S2:** Anthelmintic activity using *C. elegans*: fractions from partition of *Ozoroa insignis* fruit extract (80 % methanol); test concentration 500 µg/mL; positive control ivermectin 10µg/mL).

| Phase             | Activity %*  |
|-------------------|--------------|
| <i>n</i> -Hexane  | 92.54 ± 0.81 |
| Ethyl acetate     | 4.54 ± 4.01  |
| <i>n</i> -Butanol | 4.28 ± 1.07  |
| Aqu. residue      | 4.90 ± 1.70  |
| Ivermectin        | 100 ± 0      |
| 2% DMSO           | 3.45 ± 1.48  |

\*mortality % based on three replicates.



**Table S3:** <sup>1</sup>H NMR data (400 MHz, CDCl<sub>3</sub>, δ in ppm) of 6-[8(Z)-pentadecenyl] anacardic acid (**1**), 6-[10(Z)-heptadecenyl] anacardic acid (**2**) and 3-[7(Z)-pentadecenyl] phenol (**3**) including HMBC.

| Position 1 |                             |          | Position 2 |                             |          | Position 3 |                             |                 |
|------------|-----------------------------|----------|------------|-----------------------------|----------|------------|-----------------------------|-----------------|
|            | δ <sub>H</sub> (m, J in Hz) | Key HMBC |            | δ <sub>H</sub> (m, J in Hz) | Key HMBC |            | δ <sub>H</sub> (m, J in Hz) | Key HMBC        |
| 2          | –                           | –        | 2          | –                           | –        | 2          | 6.65 (1H, brs)              | 1, 1', 3        |
| 3          | 6.87 (1H, d, 8.4)           | 1, 5     | 3          | 6.86 (1H, d, 8.3)           | 1, 5     | 3          | –                           | –               |
| 4          | 7.36 (1H, t, 8.0)           | 2, 6     | 4          | 7.35 (1H, t, 8.0)           | 2, 6     | 4          | 6.75 (1H, d, 7.6)           | 2, 6            |
| 5          | 6.77 (1H, d, 7.6)           | 1, 1', 3 | 5          | 6.77 (1H, d, 7.4)           | 1, 1', 3 | 5          | 7.13 (1H, t, 7.7)           | 1, 3            |
| 6          | –                           | –        | 6          | –                           | –        | 6          | 6.64 (1H, d, 8.3)           | 2, 4            |
| 1'         | 2.97 (2H, t, 7.6)           | 1, 5, 6  | 1'         | 2.97 (2H, t, 7.6)           | 1, 5, 6  | 1'         | 2.55 (2H, t, 7.2)           | 2, 3, 4, 2', 3' |
| 2'         | 1.61 (1H, m)                | –        | 2'         | 1.60 (1H, m)                | –        | 2'         | 1.61 (1H, m)                | 1', 2', 3'      |
| 3'–6'      | 1.29 (8H, brs)              | –        | 3'–8'      | 1.29 (8H, brs)              | –        | 3'–5'      | 1.30 (6H, brs)              | –               |
| 7'         | 2.04 (2H, m)                | 8'       | 9'         | 2.00 (2H, m)                | 8'       | 6'         | 2.00 (2H, m)                | 8', 4'          |
| 8'         | 5.35 (1H, m)                | 10'      | 10'        | 5.34 (1H, m)                | 10'      | 7'         | 5.34 (1H, m)                | 5', 6'          |
| 9'         | 5.35 (1H, m)                | 7'       | 11'        | 5.34 (1H, m)                | 7'       | 8'         | 5.34 (1H, m)                | 9', 10'         |
| 10'        | 2.04 (2H, m)                | 9'       | 12'        | 2.00 (2H, m)                | 9'       | 9'         | 2.00 (2H, m)                | 7, 11'          |
| 11'–13'    | 1.29 (8H, brs)              | –        | 13'–14'    | 1.27 (6H, brs)              | –        | 10'–12'    | 1.30 (6H, brs)              | –               |
| 14'        | 1.29 (2H, brs)              | –        | 15'        | 1.27 (2H, brs)              | –        | 13'        | 1.28 (2H, brs)              | –               |
| 15'        | 0.88 (3H, t, 7.0)           | 13'      | 16'        | 1.27 (2H, brs)              | 13'      | 14'        | 1.27 (2H, m)                | –               |
| -COOH      | 11.04 (1H, s)               | –        | 17'        | 0.88 (3H, t, 6.7)           | –        | 15'        | 0.88 (3H, t, 6.8)           | 13', 14'        |
|            | –                           | –        | -COOH      | –                           | –        |            |                             |                 |

**Table S4:** <sup>13</sup>C NMR data (100 MHz, CDCl<sub>3</sub>, δ in ppm) of 6-[8(Z)-pentadecenyl] anacardic acid (**1**), 6-[10(Z)-heptadecenyl] anacardic acid (**2**) and 3-[7(Z)-pentadecenyl] phenol (**3**).

| Position       | 1                  | Position       | 2                  | Position       | 3                  |
|----------------|--------------------|----------------|--------------------|----------------|--------------------|
|                | δ <sub>c</sub> (m) |                | δ <sub>c</sub> (m) |                | δ <sub>c</sub> (m) |
| <b>1</b>       | 107.5 (s)          | <b>1</b>       | 110.5 (s)          | <b>1</b>       | 155.4 (s)          |
| <b>2</b>       | 163.6 (s)          | <b>2</b>       | 163.6 (s)          | <b>2</b>       | 115.3 (d)          |
| <b>3</b>       | 115.8 (d)          | <b>3</b>       | 115.8 (d)          | <b>3</b>       | 144.9 (d)          |
| <b>4</b>       | 135.3 (d)          | <b>4</b>       | 135.3 (d)          | <b>4</b>       | 120.9 (d)          |
| <b>5</b>       | 122.7 (d)          | <b>5</b>       | 122.7 (d)          | <b>5</b>       | 129.3 (d)          |
| <b>6</b>       | 147.6 (s)          | <b>6</b>       | 147.6 (s)          | <b>6</b>       | 112.4 (d)          |
| <b>1'</b>      | 36.5 (t)           | <b>1'</b>      | 36.5 (t)           | <b>1'</b>      | 35.8 (t)           |
| <b>2'</b>      | 32.0 (t)           | <b>2'</b>      | 32.0 (t)           | <b>2'</b>      | 31.2 (t)           |
| <b>3'–6'</b>   | 29.0 – 29.8 (t)    | <b>3'–8'</b>   | 29.0 – 29.8 (t)    | <b>3'–5'</b>   | 29.0 – 29.8 (t)    |
| <b>7'</b>      | 27.2 (t)           | <b>9'</b>      | 27.2 (t)           | <b>6'</b>      | 27.2 (t)           |
| <b>8'</b>      | 129.9 (d)          | <b>10'</b>     | 129.9 (d)          | <b>7'</b>      | 129.9 (d)          |
| <b>9'</b>      | 129.9 (d)          | <b>11'</b>     | 129.8 (d)          | <b>8'</b>      | 129.8 (d)          |
| <b>10'</b>     | 27.2 (t)           | <b>12'</b>     | 27.2 (t)           | <b>9'</b>      | 27.2 (t)           |
| <b>11'–12'</b> | 29.0 – 29.8 (t)    | <b>13'–14'</b> | 29.0 – 29.8 (t)    | <b>10'–12'</b> | 29.0 – 29.8 (t)    |
| <b>13'</b>     | 31.8 (t)           | <b>15'</b>     | 31.8 (t)           | <b>13'</b>     | 31.8 (t)           |
| <b>14'</b>     | 22.6 (t)           | <b>16'</b>     | 22.6 (t)           | <b>14'</b>     | 22.5 (t)           |
| <b>15'</b>     | 14.1 (q)           | <b>17'</b>     | 14.1 (q)           | <b>15'</b>     | 14.1 (q)           |
| <b>-COOH</b>   | 175.4 (s)          | <b>-COOH</b>   | 175.5 (s)          |                |                    |

**Table S5:** Anthelmintic activity using *C. elegans*: anthelmintic activity of 6-[8(Z)-pentadecenyl] anacardic acid (**1**), 6-[10(Z)-heptadecenyl] anacardic acid (**2**) and 3-[7(Z)-pentadecenyl] phenol (**3**).

| conc.<br>( $\mu\text{g/mL}$ )        | Activity %*<br>(1) | $\mu\text{M}$<br>(1) | Activity %*<br>(2) | $\mu\text{M}$<br>(2) | Activity %*<br>(3) |
|--------------------------------------|--------------------|----------------------|--------------------|----------------------|--------------------|
| 500                                  | 100 $\pm$ 0        | 1440.00              | 100 $\pm$ 0        | 1334.80              | 0.79 $\pm$ 1.12    |
| 250                                  | 100 $\pm$ 0        | 721.40               | 97.73 $\pm$ 1.72   | 667.40               | n. t.              |
| 125                                  | 97.01 $\pm$ 0.22   | 360.70               | 94.39 $\pm$ 5.36   | 333.70               | n. t.              |
| 62.5                                 | 78.19 $\pm$ 9.99   | 180.30               | 73.98 $\pm$ 3.12   | 166.80               | n. t.              |
| 31.25                                | 63.42 $\pm$ 7.29   | 90.18                | 47.41 $\pm$ 3.37   | 83.43                | n. t.              |
| 15.625                               | 46.40 $\pm$ 10.02  | 45.09                | 24.78 $\pm$ 2.28   | 41.71                | n. t.              |
| Ivermectin<br>(10 $\mu\text{g/mL}$ ) | 99.07 $\pm$ 1.31   |                      | 95.59 $\pm$ 0.71   |                      | 98.45 $\pm$ 1.26   |
| 2% DMSO                              | 0.95 $\pm$ 1.35    |                      | 0                  |                      | 1.36 $\pm$ 0.97    |

\*Activity % based on three replicates.

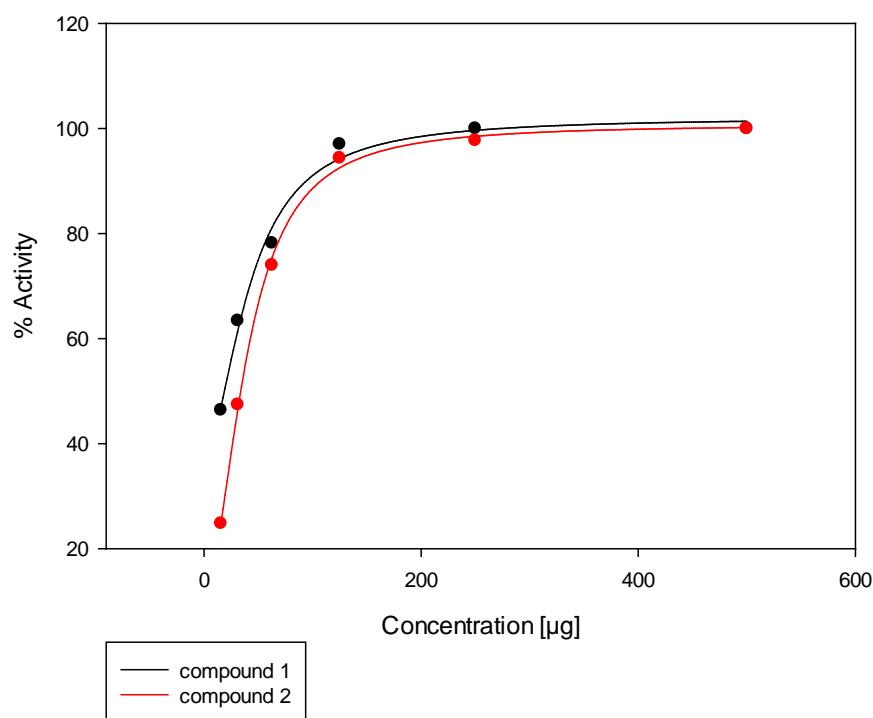

**Figure S29:** Graph for  $\text{LC}_{50}$  of 6-[8(Z)-pentadecenyl] anacardic acid (**1**) and 6-[10(Z)-heptadecenyl] anacardic acid (**2**) (testorganism: *C. elegans*).

**Table S6:**  $\text{LC}_{50}$  values of 6-[8(Z)-pentadecenyl] anacardic acid (**1**), 6-[10(Z)-heptadecenyl] anacardic acid (**2**) (testorganism: *C. elegans*).

| Compound | $\text{LC}_{50}$ ( $\mu\text{M}$ ) |
|----------|------------------------------------|
| <b>1</b> | 51,9 $\pm$ 10,33                   |
| <b>2</b> | 93,4 $\pm$ 3,53                    |
